# Supplementary material for: Prenatal Multivitamin Use and MTHFR Genotype Are Associated with Newborn Cord Blood DNA Methylation
Source: MDPI journal article supplement (doi:10.3390/ijerph17249190), 2020-12-09

## Supplementary Information:

This document contains 8 supplementary tables and 4 supplementary figures.

**Supplementary Table S1: Full sample with cord blood DNA methylation measures and study sample after removing for missingness.** P-values were calculated for the difference between the study sample and the excluded sample, using t-test for continuous variables and chi-square test of expected probabilities for categorical.

|                             | Full Sample (n = 175) | Study Sample (n = 130) | Excluded (n = 45) | P     |
|-----------------------------|-----------------------|------------------------|-------------------|-------|
| <b>Mean DNAm (% , sd)</b>   |                       |                        |                   |       |
| All                         | 50.81 (0.90)          | 50.80 (0.94)           | 50.85 (0.81)      | 0.73  |
| Open Sea                    | 73.63 (1.26)          | 73.61 (1.30)           | 73.69 (1.16)      | 0.71  |
| Shelf                       | 78.08 (1.37)          | 78.06 (1.40)           | 78.13 (1.30)      | 0.76  |
| Shore                       | 46.76 (0.85)          | 46.76 (0.87)           | 46.77 (0.81)      | 0.93  |
| Island                      | 19.41 (0.56)          | 19.40 (0.58)           | 19.44 (0.51)      | 0.65  |
| Maternal Age (years)        | 33.30 (4.60)          | 33.62 (4.63)           | 32.36 (4.45)      | 0.11  |
| <b>Sex</b>                  |                       |                        |                   |       |
| Female                      | 85 (48.6%)            | 64 (49.2%)             | 21 (46.7%)        | 0.73  |
| Male                        | 90 (51.4%)            | 66 (50.8%)             | 24 (53.3%)        |       |
| <b>Maternal Education</b>   |                       |                        |                   |       |
| High school or less         | 33 (18.9%)            | 26 (20.0%)             | 7 (15.6%)         | 0.69  |
| Less than 4 Yrs College     | 23 (13.1%)            | 18 (13.8%)             | 5 (11.1%)         |       |
| 4 Yrs of College            | 77 (44.0%)            | 57 (43.8%)             | 20 (44.4%)        |       |
| Post Graduate               | 35 (20.0%)            | 29 (22.3%)             | 6 (13.3%)         |       |
| Missing                     | 7 (4.0%)              | -                      | 7 (16.6%)         |       |
| <b>Race</b>                 |                       |                        |                   |       |
| Non-Hispanic White          | 85 (48.6%)            | 66 (50.8%)             | 19 (42.2%)        | 0.14  |
| Non-Hispanic Black          | 15 (8.6%)             | 12 (9.2%)              | 3 (6.7%)          |       |
| Hispanic/Latino             | 23 (13.1%)            | 14 (10.8%)             | 9 (20.0%)         |       |
| Other                       | 48 (27.4%)            | 38 (29.2%)             | 10 (22.2%)        |       |
| Missing                     | 4 (2.3%)              | -                      | 4 (8.9%)          |       |
| <b>Multi-vitamin Use</b>    |                       |                        |                   |       |
| None Pre-Conception         | 102 (58.3%)           | 86 (66.2%)             | 16 (35.6%)        | 0.73  |
| Used Pre- Conception        | 51 (29.1%)            | 44 (33.8%)             | 7 (15.6%)         |       |
| Missing                     | 22 (12.6%)            | -                      | 22 (48.9%)        |       |
| <b>Prenatal Vitamin Use</b> |                       |                        |                   |       |
| None Pre- Conception        | 92 (52.6%)            | 79 (60.8%)             | 13 (28.9%)        | 0.26  |
| Used Pre- Conception        | 64 (36.6%)            | 51 (39.2%)             | 13 (28.9%)        |       |
| Missing                     | 19 (10.9%)            | -                      | 19 (42.2%)        |       |
| <b>Folic Acid Use</b>       |                       |                        |                   |       |
| None Pre- Conception        | 131 (74.9%)           | 115 (88.5%)            | 16 (35.6%)        | 0.56  |
| Used Pre- Conception        | 18 (10.3%)            | 15 (11.5%)             | 3 (6.7%)          |       |
| Missing                     | 26 (14.9%)            | -                      | 26 (57.8%)        |       |
| <b>MTHFR C677T in child</b> |                       |                        |                   |       |
| Not Present                 | 89 (50.9%)            | 63 (48.5%)             | 26 (57.8%)        | 0.08  |
| At least one allele         | 83 (47.4%)            | 67 (51.5%)             | 16 (35.6%)        |       |
| Missing                     | 3 (1.7%)              | -                      | 3 (6.7%)          |       |
| <b>MTHFR C677T in mom</b>   |                       |                        |                   |       |
| Not Present                 | 74 (42.3%)            | 55 (42.3%)             | 19 (42.2%)        | 0.11  |
| At least one allele         | 90 (51.4%)            | 75 (57.7%)             | 15 (33.3%)        |       |
| Missing                     | 11 (6.3%)             | -                      | 11 (24.4%)        |       |
| <b>Round</b>                |                       |                        |                   | 0.004 |

|                                 |             |             |             |      |
|---------------------------------|-------------|-------------|-------------|------|
| 1                               | 115 (65.7%) | 92 (70.8%)  | 23 (51.1%)  |      |
| 2                               | 60 (34.3%)  | 38 (29.2%)  | 22 (48.9%)  |      |
| <b>Cell Type (%<b>, sd)</b></b> |             |             |             |      |
| nRBC                            | 10.1 (5.4)  | 9.8 (5.2)   | 11.0 (5.9)  | 0.23 |
| Granulocytes                    | 42.8 (12.5) | 43.4 (12.3) | 40.9 (12.9) | 0.26 |

**Supplementary Table S2.** Folic acid use pre-conception by covariates. P-values for difference in variables by multivitamin intake is from t-test for continuous variables, and chi-square test for categorical variables.

| <b>Folic Acid Pre-Conception</b>        |                            |                            |                |
|-----------------------------------------|----------------------------|----------------------------|----------------|
|                                         | <b>No (<i>n</i> = 115)</b> | <b>Yes (<i>n</i> = 15)</b> | <b>P-value</b> |
| <b>Mean DNAm (%<i>, sd</i>)</b>         |                            |                            |                |
| All                                     | 50.8 (1.0)                 | 51.0 (0.8)                 | 0.31           |
| Open Sea                                | 73.6 (1.3)                 | 73.9 (1.0)                 | 0.21           |
| Shelf                                   | 78.0 (1.4)                 | 78.4 (1.1)                 | 0.20           |
| Shore                                   | 46.7 (0.9)                 | 46.9 (0.8)                 | 0.46           |
| Island                                  | 19.4 (0.6)                 | 19.5 (0.6)                 | 0.58           |
| Maternal Age (years)                    | 33.6 (4.5)                 | 33.9 (5.7)                 | 0.82           |
| <b>Sex:</b>                             |                            |                            | 0.63           |
| Female                                  | 58 (50.4%)                 | 6 (40.0%)                  |                |
| Male                                    | 57 (49.6%)                 | 9 (60.0%)                  |                |
| <b>Maternal Education</b>               |                            |                            |                |
| High School or Less                     |                            |                            |                |
| Less Than 4 Years                       | 23 (20.0%)                 | 3 (20.0%)                  | 0.71           |
| College                                 | 15 (13.0%)                 | 3 (20.0%)                  |                |
| 4 Years of College                      | 52 (45.2%)                 | 5 (33.3%)                  |                |
| Post Graduate                           | 25 (21.7%)                 | 4 (26.7%)                  |                |
| <b>Maternal Race</b>                    |                            |                            |                |
| Non-Hispanic White                      | 58 (50.4%)                 | 8 (53.3%)                  | 0.70           |
| Non-Hispanic Black                      | 12 (10.4%)                 | 0 (0.00%)                  |                |
| Hispanic/Latino                         | 12 (10.4%)                 | 2 (13.3%)                  |                |
| Other                                   | 33 (28.7%)                 | 5 (33.3%)                  |                |
| <b>Multivitamins Pre-Conception</b>     |                            |                            |                |
| No                                      | 77 (67.0%)                 | 9 (60.0%)                  | 0.81           |
| Yes                                     | 38 (33.0%)                 | 6 (40.0%)                  |                |
| <b>Prenatal Vitamins Pre-Conception</b> |                            |                            |                |
| No                                      | 72 (62.6%)                 | 7 (46.7%)                  | 0.36           |
| Yes                                     | 43 (37.4%)                 | 8 (53.3%)                  |                |
| <b>Child MTHFR C677T</b>                |                            |                            |                |
| <b>Genotype</b>                         |                            |                            |                |
| CC                                      | 56 (48.7%)                 | 7 (46.7%)                  | 1.0            |
| TT or TC                                | 59 (51.3%)                 | 8 (53.3%)                  |                |
| <b>Maternal MTHFR C677T Genotype</b>    |                            |                            |                |
| CC                                      | 47 (40.9%)                 | 8 (53.3%)                  | 0.52           |
| TT or TC                                | 68 (59.1%)                 | 7 (46.7%)                  |                |
| <b>Round</b>                            |                            |                            |                |
| 1                                       | 83 (72.2%)                 | 9 (60.0%)                  | 0.37           |
| 2                                       | 32 (27.8%)                 | 6 (40.0%)                  |                |
| <b>Cell Type (%<i>, sd</i>)</b>         |                            |                            |                |
| nRBC                                    | 9.87 (5.35)                | 9.18 (3.80)                | 0.54           |
| Granulocytes                            | 43.3 (12.3)                | 44.5 (12.6)                |                |

**Supplementary Table S3.** Prenatal vitamin use pre-conception by covariates. P-values for difference in variables by multivitamin intake is from t-test for continuous variables, and chi-square test for categorical variables.

| <b>Prenatal Vitamins Pre-Pregnancy</b>  |                           |                            |                |
|-----------------------------------------|---------------------------|----------------------------|----------------|
|                                         | <b>No (<i>n</i> = 79)</b> | <b>Yes (<i>n</i> = 51)</b> | <b>P-value</b> |
| <b>Mean DNAm (%<i>, sd</i>)</b>         |                           |                            |                |
| All                                     | 50.8 (0.86)               | 50.7 (1.04)                | 0.50           |
| Open Sea                                | 73.7 (1.22)               | 73.5 (1.42)                | 0.31           |
| Shelf                                   | 78.2 (1.30)               | 77.9 (1.55)                | 0.31           |
| Shore                                   | 46.8 (0.81)               | 46.7 (0.95)                | 0.51           |
| Island                                  | 19.4 (0.51)               | 19.4 (0.67)                | 0.55           |
| Maternal Age (years)                    | 33.4 (4.77)               | 34.0 (4.43)                | 0.50           |
| <b>Sex:</b>                             |                           |                            |                |
| Female                                  | 41 (51.9%)                | 23 (45.1%)                 | 0.56           |
| Male                                    | 38 (48.1%)                | 28 (54.9%)                 |                |
| <b>Maternal Education</b>               |                           |                            |                |
| High School or Less                     | 19 (24.1%)                | 7 (13.7%)                  | 0.038          |
| Less Than 4 Years College               | 14 (17.7%)                | 4 (7.84%)                  |                |
| 4 Years of College                      | 27 (34.2%)                | 30 (58.8%)                 |                |
| Post Graduate                           | 19 (24.1%)                | 10 (19.6%)                 |                |
| <b>Maternal Race</b>                    |                           |                            |                |
| Non-Hispanic White                      | 43 (54.4%)                | 23 (45.1%)                 | 0.43           |
| Non-Hispanic Black                      | 6 (7.59%)                 | 6 (11.8%)                  |                |
| Hispanic/Latino                         | 10 (12.7%)                | 4 (7.84%)                  |                |
| Other                                   | 20 (25.3%)                | 18 (35.3%)                 |                |
| <b>Multivitamins Pre-Conception</b>     |                           |                            |                |
| No                                      | 43 (54.4%)                | 43 (84.3%)                 | 0.001          |
| Yes                                     | 36 (45.6%)                | 8 (15.7%)                  |                |
| <b>Prenatal Vitamins Pre-Conception</b> |                           |                            |                |
| No                                      | 72 (91.1%)                | 43 (84.3%)                 | 0.36           |
| Yes                                     | 7 (8.86%)                 | 8 (15.7%)                  |                |
| <b>Child MTHFR C677T Genotype</b>       |                           |                            |                |
| CC                                      | 35 (44.3%)                | 28 (54.9%)                 | 0.32           |
| TT or TC                                | 44 (55.7%)                | 23 (45.1%)                 |                |
| <b>Maternal MTHFR C677T Genotype</b>    |                           |                            |                |
| CC                                      | 28 (35.4%)                | 27 (52.9%)                 | 0.073          |
| TT or TC                                | 51 (64.6%)                | 24 (47.1%)                 |                |
| <b>Round</b>                            |                           |                            |                |
| 1                                       | 57 (72.2%)                | 35 (68.6%)                 | 0.82           |
| 2                                       | 22 (27.8%)                | 16 (31.4%)                 |                |
| <b>Cell Type (%<i>, sd</i>)</b>         |                           |                            |                |
| nRBC                                    | 9.62 (5.09)               | 10.1 (5.36)                | 0.64           |
| Granulocytes                            | 44.0 (12.7)               | 42.5 (11.7)                | 0.49           |

**Supplementary Table S4.** Among DNA methylation sites nominally associated ( $P < 0.05$ ) with each exposure and genotype, number and proportion of sites that were hypermethylated and hypomethylated.

|                                           | DNA methylated sites hypomethylated |         | DNA methylated sites hypermethylated |         |
|-------------------------------------------|-------------------------------------|---------|--------------------------------------|---------|
|                                           | N                                   | Percent | N                                    | Percent |
| <b>Multivitamin</b>                       |                                     |         |                                      |         |
| Overall                                   | 3151                                | 20.5    | 12191                                | 79.5    |
| Stratified by Maternal <i>MTHFR</i> C677T |                                     |         |                                      |         |
| CC                                        | 1241                                | 2.5     | 49076                                | 97.5    |
| TC/TT                                     | 9772                                | 75.7    | 3135                                 | 24.3    |
| Stratified by Child <i>MTHFR</i> C677T    |                                     |         |                                      |         |
| CC                                        | 3215                                | 9.8     | 29645                                | 90.2    |
| TC/TT                                     | 4932                                | 57.6    | 3627                                 | 42.4    |
| <b>Folic Acid</b>                         |                                     |         |                                      |         |
| Overall                                   | 2467                                | 14.3    | 14811                                | 85.7    |
| Stratified by Maternal <i>MTHFR</i> C677T |                                     |         |                                      |         |
| CC                                        | 5605                                | 7.7     | 66948                                | 92.3    |
| TC/TT                                     | 9425                                | 63.6    | 5403                                 | 36.4    |
| Stratified by Child <i>MTHFR</i> C677T    |                                     |         |                                      |         |
| CC                                        | 2985                                | 18.9    | 12833                                | 81.1    |
| TC/TT                                     | 4299                                | 39.2    | 6632                                 | 60.7    |
| <b>Prenatal Vitamin</b>                   |                                     |         |                                      |         |
| Overall                                   | 4199                                | 39.2    | 6519                                 | 60.8    |
| Stratified by Maternal <i>MTHFR</i> C677T |                                     |         |                                      |         |
| CC                                        | 2515                                | 23.9    | 8007                                 | 76.1    |
| TC/TT                                     | 13265                               | 74.9    | 4437                                 | 25.1    |
| Stratified by Child <i>MTHFR</i> C677T    |                                     |         |                                      |         |
| CC                                        | 4683                                | 50.2    | 4643                                 | 49.8    |
| TC/TT                                     | 3820                                | 34.8    | 7145                                 | 65.2    |
| <b><i>MTHFR</i> C677T</b>                 |                                     |         |                                      |         |
| TC/TT in Child                            | 4913                                | 5.6     | 83442                                | 94.4    |
| TC/TT in Mother                           | 6299                                | 7.3     | 80329                                | 92.7    |

**Supplementary Table S5.** Top pathways for single site supplement models. Pathways with  $P < 0.05$  and at least 5 observed terms shown. For prenatal vitamins, pathways with at least 2 observed terms shown.

| GO Term ID               | GO Term Name                                                    | N Genes in Term | N Genes With CpG $P < 0.001$ | P        | FDR      |
|--------------------------|-----------------------------------------------------------------|-----------------|------------------------------|----------|----------|
| <b>Multivitamins</b>     |                                                                 |                 |                              |          |          |
| GO:0007156               | homophilic cell adhesion via plasma membrane adhesion molecules | 151             | 14                           | 1.90E-11 | 4.24E-07 |
| GO:0022610               | biological adhesion                                             | 1295            | 18                           | 0.00077  | 1        |
| GO:0007267               | cell-cell signaling                                             | 1582            | 19                           | 0.003    | 1        |
| GO:0007399               | nervous system development                                      | 2182            | 25                           | 0.0031   | 1        |
| GO:0007154               | cell communication                                              | 6196            | 42                           | 0.017    | 1        |
| GO:0009416               | response to light stimulus                                      | 288             | 5                            | 0.018    | 1        |
| GO:0023052               | signaling                                                       | 6172            | 41                           | 0.029    | 1        |
| <b>Folic Acid</b>        |                                                                 |                 |                              |          |          |
| GO:0051056               | regulation of small GTPase mediated signal transduction         | 312             | 10                           | 0.00055  | 1        |
| GO:1901700               | response to oxygen-containing compound                          | 1504            | 20                           | 0.005    | 1        |
| GO:0006955               | immune response                                                 | 1859            | 20                           | 0.0052   | 1        |
| GO:0001678               | cellular glucose homeostasis                                    | 131             | 5                            | 0.0057   | 1        |
| GO:0050896               | response to stimulus                                            | 8330            | 69                           | 0.0075   | 1        |
| GO:0043087               | regulation of GTPase activity                                   | 445             | 9                            | 0.011    | 1        |
| GO:0006810               | transport                                                       | 4688            | 43                           | 0.017    | 1        |
| GO:0098657               | import into cell                                                | 721             | 11                           | 0.019    | 1        |
| GO:0006897               | endocytosis                                                     | 646             | 10                           | 0.02     | 1        |
| GO:0007186               | G-protein coupled receptor signaling pathway                    | 1220            | 11                           | 0.033    | 1        |
| GO:0051707               | response to other organism                                      | 794             | 9                            | 0.033    | 1        |
| GO:0009605               | response to external stimulus                                   | 2082            | 21                           | 0.041    | 1        |
| GO:0009056               | catabolic process                                               | 2397            | 23                           | 0.046    | 1        |
| GO:0009607               | response to biotic stimulus                                     | 836             | 9                            | 0.046    | 1        |
| <b>Prenatal Vitamins</b> |                                                                 |                 |                              |          |          |
| GO:0016331               | morphogenesis of embryonic epithelium                           | 145             | 4                            | 0.003    | 1        |
| GO:0048486               | parasympathetic nervous system development                      | 17              | 2                            | 0.0031   | 1        |
| GO:0001504               | neurotransmitter uptake                                         | 31              | 2                            | 0.006    | 1        |
| GO:0030224               | monocyte differentiation                                        | 32              | 2                            | 0.0061   | 1        |
| GO:0031670               | cellular response to nutrient                                   | 57              | 2                            | 0.016    | 1        |
| GO:0002181               | cytoplasmic translation                                         | 78              | 2                            | 0.024    | 1        |
| GO:0050807               | regulation of synapse organization                              | 152             | 3                            | 0.025    | 1        |
| GO:0070509               | calcium ion import                                              | 67              | 2                            | 0.027    | 1        |
| GO:0050808               | synapse organization                                            | 282             | 4                            | 0.028    | 1        |
| GO:0050803               | regulation of synapse structure or activity                     | 163             | 3                            | 0.029    | 1        |
| GO:0043523               | regulation of neuron apoptotic process                          | 186             | 3                            | 0.034    | 1        |

**Supplementary Table S6.** Top pathways for single site *MTHFR* C677T models. Pathways with p-value<0.001 and at least 5 terms shown.

| GO Term ID                   | GO Term Name                                                 | N Genes in Term | N Genes With CpG P<0.001 | P        | FDR  |
|------------------------------|--------------------------------------------------------------|-----------------|--------------------------|----------|------|
| <b>Child <i>MTHFR</i></b>    |                                                              |                 |                          |          |      |
| GO:0010811                   | positive regulation of cell-substrate adhesion               | 116             | 33                       | 8.82E-07 | 0.01 |
| GO:0031589                   | cell-substrate adhesion                                      | 324             | 60                       | 0.00057  | 1    |
| GO:0042310                   | vasoconstriction                                             | 70              | 17                       | 0.00064  | 1    |
| GO:0022610                   | biological adhesion                                          | 1336            | 192                      | 0.00093  | 1    |
| <b>Maternal <i>MTHFR</i></b> |                                                              |                 |                          |          |      |
| GO:1901890                   | positive regulation of cell junction assembly                | 31              | 14                       | 4.57E-05 | 0.23 |
| GO:0051056                   | regulation of small GTPase mediated signal transduction      | 294             | 69                       | 6.15E-05 | 0.23 |
| GO:0010811                   | positive regulation of cell-substrate adhesion               | 116             | 31                       | 0.000231 | 0.58 |
| GO:0070647                   | protein modification by small protein conjugation or removal | 970             | 153                      | 0.000361 | 0.64 |
| GO:0051704                   | multi-organism process                                       | 2229            | 307                      | 0.000448 | 0.64 |
| GO:0048012                   | hepatocyte growth factor receptor signaling pathway          | 16              | 8                        | 0.000469 | 0.64 |
| GO:0043412                   | macromolecule modification                                   | 3992            | 553                      | 0.000556 | 0.64 |
| GO:0051179                   | localization                                                 | 6091            | 823                      | 0.000577 | 0.64 |
| GO:0051336                   | regulation of hydrolase activity                             | 1208            | 190                      | 0.000616 | 0.64 |
| GO:0006464                   | cellular protein modification process                        | 3801            | 531                      | 0.000627 | 0.64 |
| GO:0006810                   | transport                                                    | 4689            | 635                      | 0.000749 | 0.66 |
| GO:0010923                   | negative regulation of phosphatase activity                  | 95              | 24                       | 0.000814 | 0.66 |
| GO:0031589                   | cell-substrate adhesion                                      | 324             | 68                       | 0.000855 | 0.66 |
| GO:0007264                   | small GTPase mediated signal transduction                    | 504             | 96                       | 0.00093  | 0.66 |

**Supplementary Table S7.** GAMP test P-values for the effect of pre-conception supplement intake on cumulative density distribution of cord blood DNA methylation. Adjusted for sex, maternal age, maternal education, ancestry, batch, and cell type proportions for nucleated red blood cells and granulocytes.

|                                     | Overall | Open Sea | Shelf | Shore | Island |
|-------------------------------------|---------|----------|-------|-------|--------|
| <b>Folic Acid</b>                   |         |          |       |       |        |
| Unstratified                        | 0.038   | 0.042    | 0.041 | 0.028 | 0.597  |
| Stratified by Maternal <i>MTHFR</i> |         |          |       |       |        |
| CC Genotype                         | 0.095   | 0.087    | 0.097 | 0.089 | 0.686  |
| CT or TT Genotype                   | 0.131   | 0.139    | 0.155 | 0.127 | 0.315  |
| Stratified by Child <i>MTHFR</i>    |         |          |       |       |        |
| CC Genotype                         | 0.08    | 0.085    | 0.079 | 0.066 | 0.648  |
| CT or TT Genotype                   | 0.176   | 0.158    | 0.17  | 0.162 | 0.486  |
| <b>Multivitamins</b>                |         |          |       |       |        |
| Unstratified                        | 0.11    | 0.091    | 0.091 | 0.112 | 0.619  |
| Stratified by Maternal <i>MTHFR</i> |         |          |       |       |        |
| CC Genotype                         | 0.029   | 0.039    | 0.042 | 0.016 | 0.056  |
| CT or TT Genotype                   | 0.369   | 0.337    | 0.351 | 0.34  | 0.432  |
| Stratified by Child <i>MTHFR</i>    |         |          |       |       |        |
| CC Genotype                         | 0.053   | 0.046    | 0.047 | 0.058 | 0.512  |
| CT or TT Genotype                   | 0.871   | 0.715    | 0.697 | 0.761 | 1.0    |
| <b>Prenatal Vitamins</b>            |         |          |       |       |        |
| Unstratified                        | 0.445   | 0.842    | 0.854 | 0.348 | 0.078  |
| Stratified by Maternal <i>MTHFR</i> |         |          |       |       |        |
| CC Genotype                         | 0.358   | 0.388    | 0.356 | 0.297 | 0.436  |
| CT or TT Genotype                   | 0.581   | 1.0      | 0.831 | 0.729 | 0.192  |
| Stratified by Child <i>MTHFR</i>    |         |          |       |       |        |
| CC Genotype                         | 0.541   | 0.523    | 0.577 | 0.638 | 0.223  |
| CT or TT Genotype                   | 0.585   | 0.531    | 0.593 | 0.565 | 0.513  |



**Supplementary Table S8.** Global methylation differences by multivitamin supplementation prior to pregnancy, stratified by *MTHFR* genotype, in maternal blood and placenta.

| Tissue Type                      | Global Methylation Difference |                      |
|----------------------------------|-------------------------------|----------------------|
|                                  | CC Genotype                   | CT/TT Genotype       |
| Maternal Blood (Early Pregnancy) | -0.10 (-0.47, 0.26)           | -0.08 (-0.40, 0.23)  |
| Maternal Blood (Late Pregnancy)  | -0.28 (-1.03, 0.07)           | -0.70 (-1.40, -0.01) |
| Placenta (Maternal Side)         | 0.57 (-0.30, 1.47)            | 0.35 (-1.21, 0.52)   |
| Placenta (Fetal Side)            | 0.26 (-1.14, 1.66)            | -0.17 (-0.61, 0.94)  |

**Supplementary Figure S1.** QQ-plots of single site models. A. Multivitamin model. B. Folic acid model. C. Prenatal vitamin model. D. Child *MTHFR* C677T model. E. Maternal *MTHFR* C677T model.

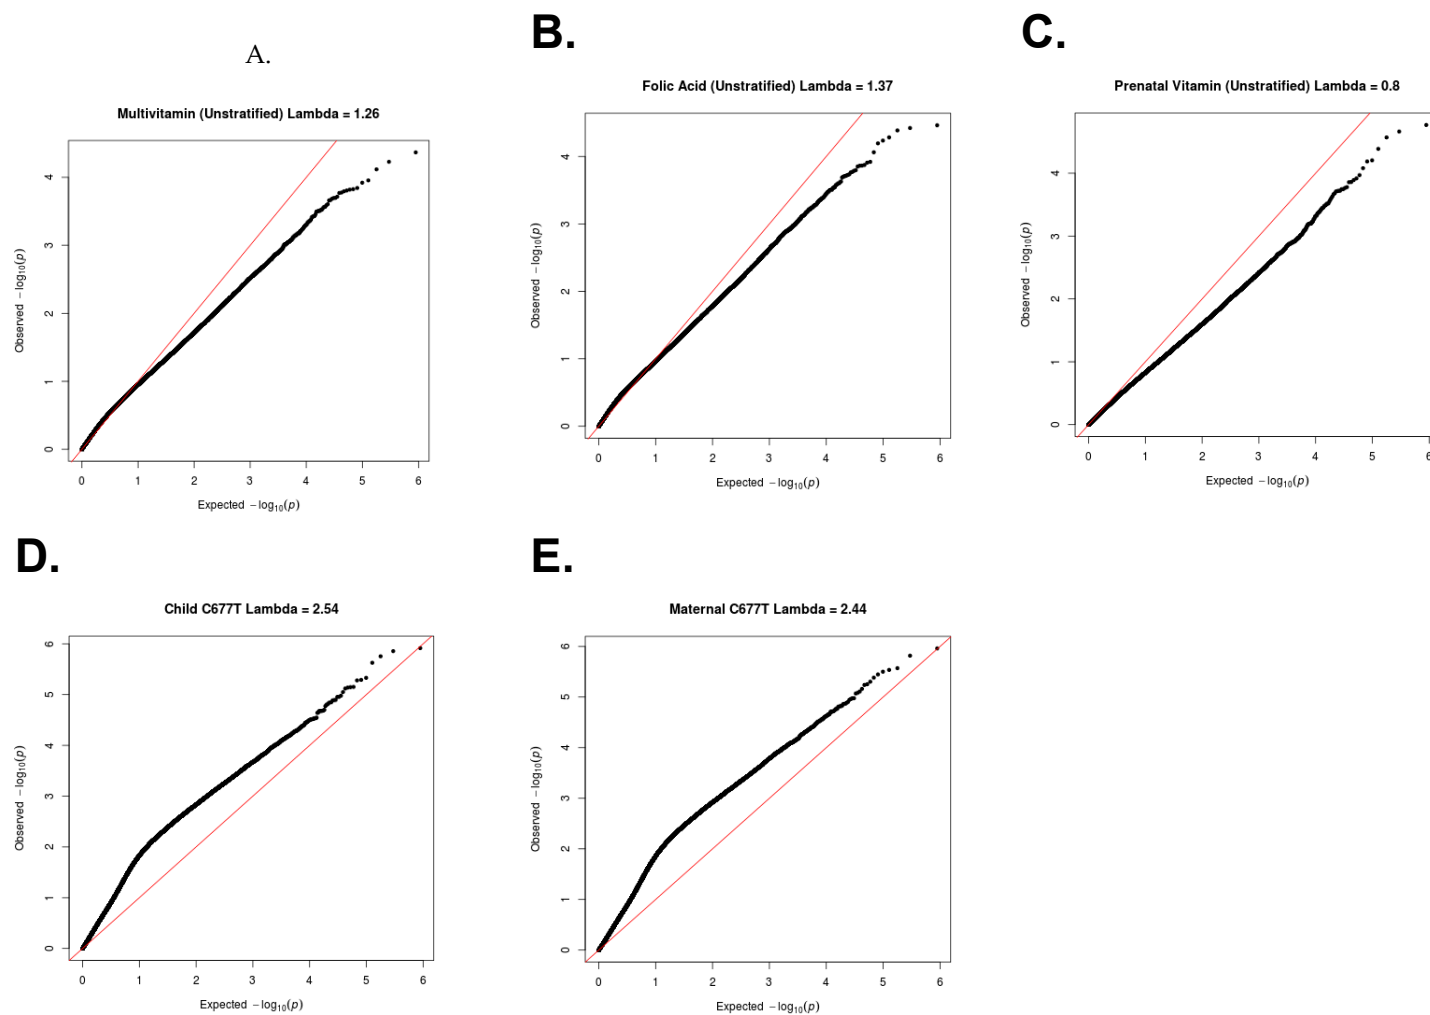

Supplementary Figure S2. Unadjusted supplement and global DNA methylation by genomic regions.

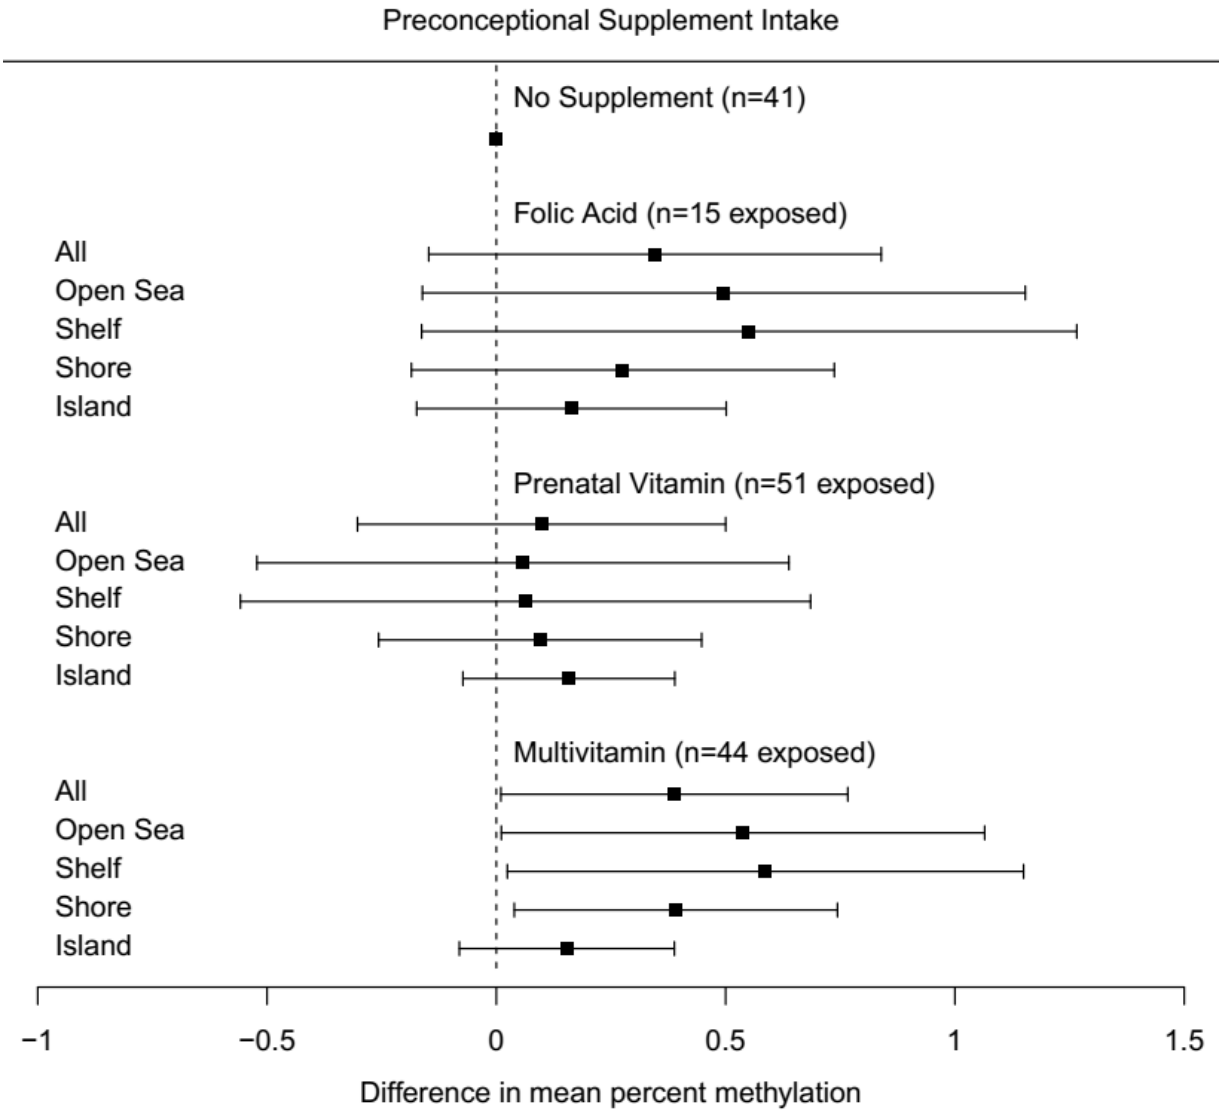

**Supplementary Figure 3.** Estimated model coefficients for effect of pre-conception folic acid use. Models were adjusted for sex, maternal age, maternal education, ancestry, batch, and cell type proportions for nucleated red blood cells and granulocytes. .

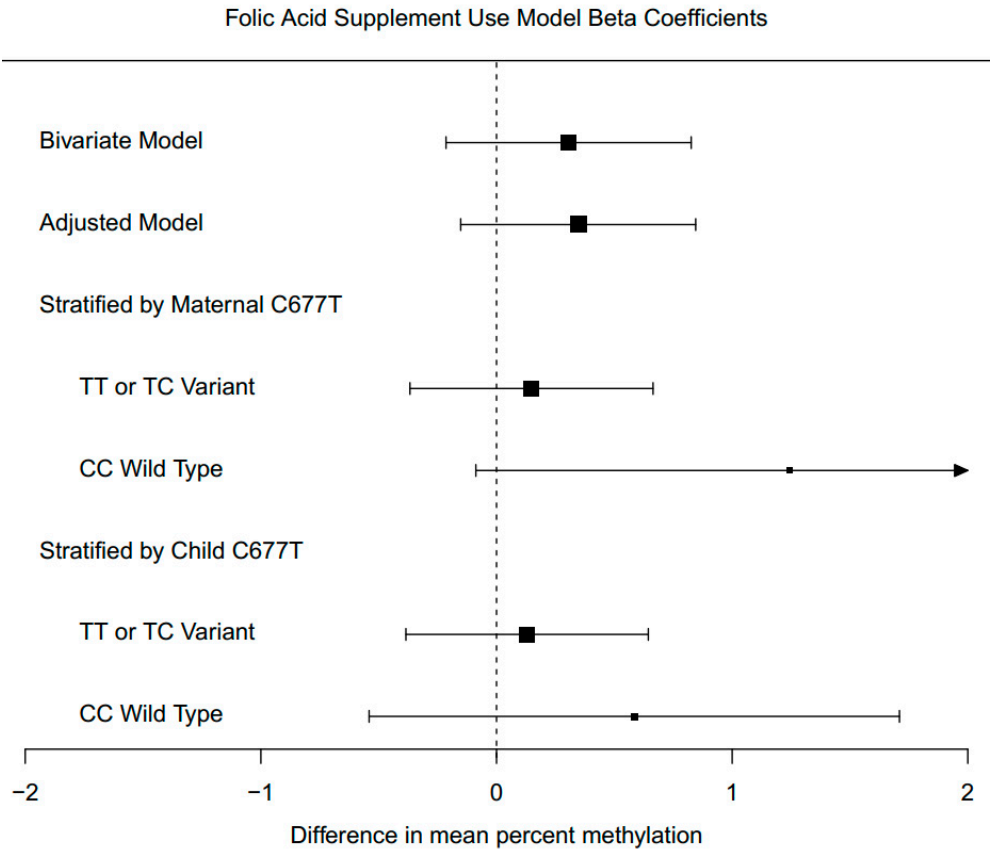

**Supplementary Figure S4.** Estimated model coefficients for effect of pre-conception prenatal vitamin use. Models were adjusted for sex, maternal age, maternal education, ancestry, batch, and cell type proportions for nucleated red blood cells and granulocytes. .

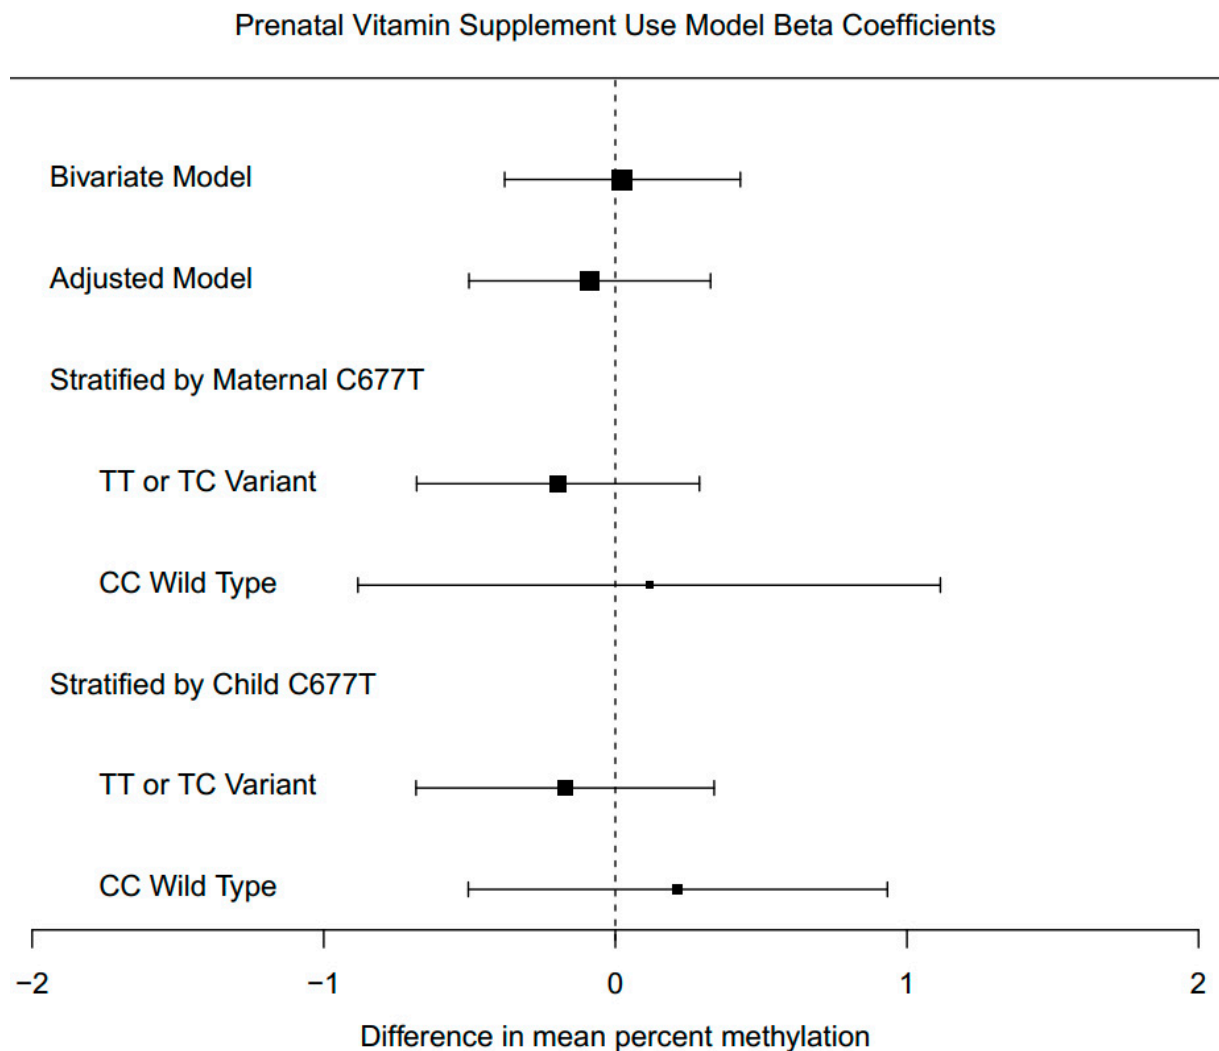

Supplement: s1 [file s1]
